# Supplementary material for: Ru catalyst supported on nitrogen-doped nanotubes as high efficiency electrocatalysts for hydrogen evolution in alkaline media
Source: Royal Society of Chemistry journal article supplement (doi:10.1039/d0ra02894k), 2020-01-01
Supplement: d0ra02894k1.pdf [file d0ra02894k1.pdf]

# Supplementary Information

## **Ru catalyst supported on nitrogen-doped Nanotubes as High efficiency Electrocatalysts for hydrogen Evolution in Alkaline**

### **Media**

Qinglei Liu <sup>a</sup>, Lehao Yang <sup>a</sup>, Peng Sun <sup>a</sup>, Haigang Liu <sup>a</sup>, Jiahua Zhao <sup>a</sup>, Xiankun Ma <sup>a</sup>, Yongfei Wang <sup>\*a</sup>  
and Zhiqiang Zhang <sup>\*a</sup>

*School of Chemical Engineering, University of Science and Technology Liaoning, Anshan, 114041,  
China. email: wyf8307@ustl.edu.cn*

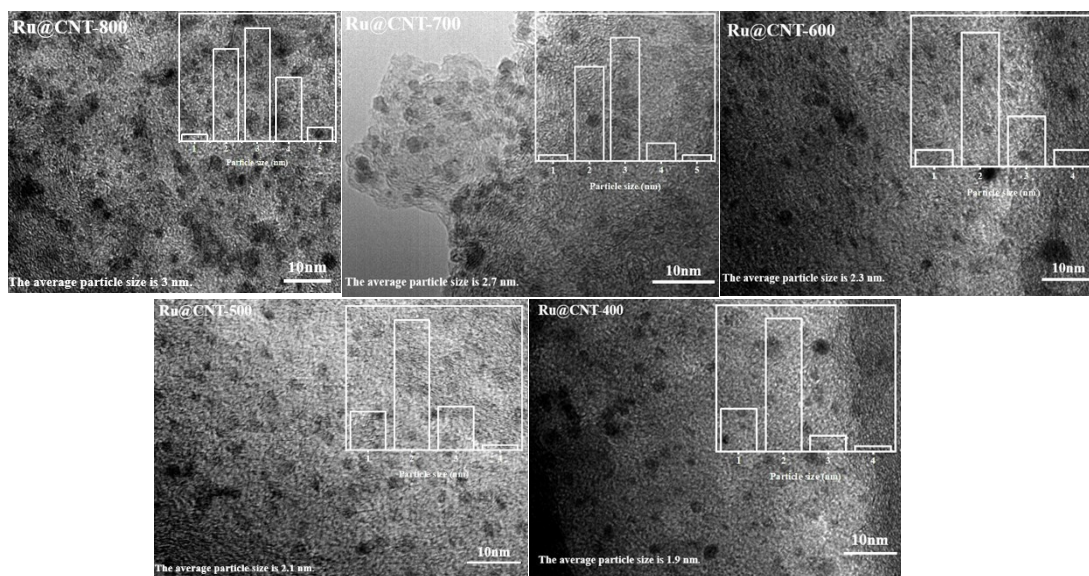

Fig.S1 TEM images of all Ru@CNT samples.

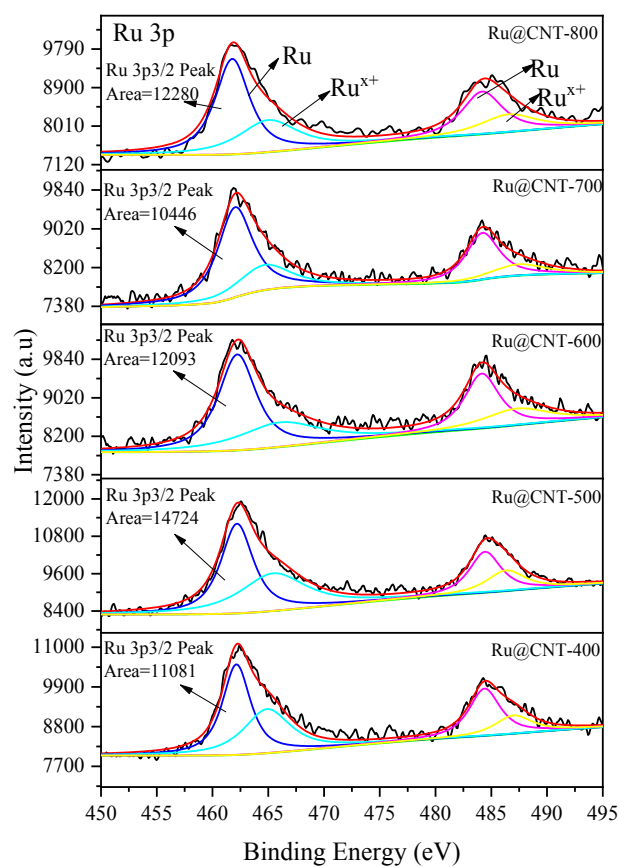

Fig.S2 Ru 3p spectra of all Ru@CNT samples.

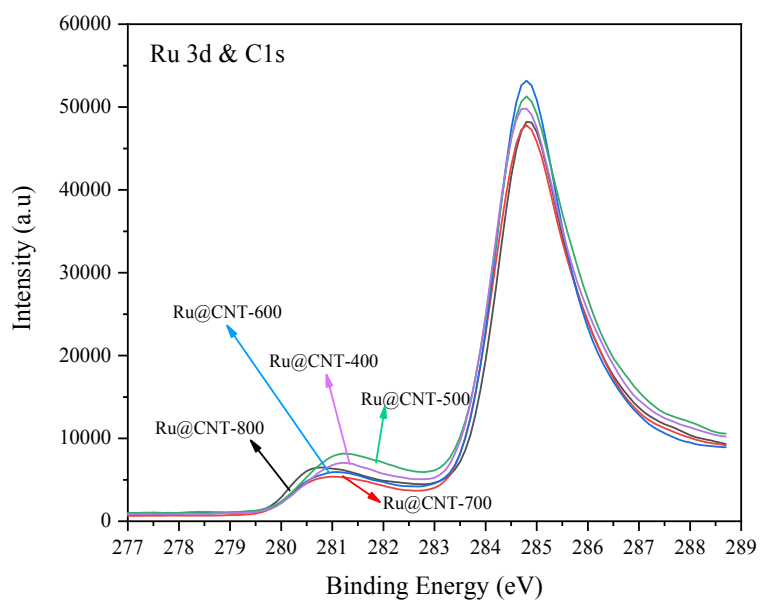

Fig.S3 Ru 3d spectra of all Ru@CNT samples.

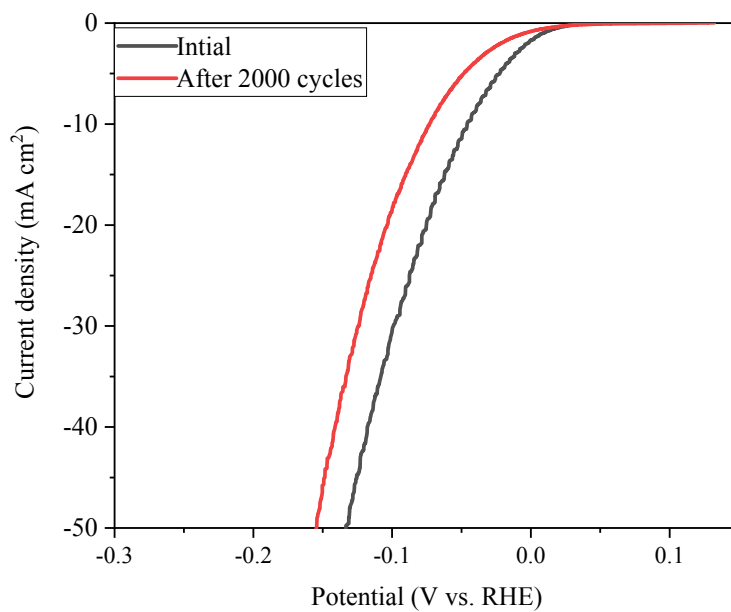

Fig.S4 HER polarization curves recorded before and after 2000 potential cycles.
